# Supplementary material for: Association of Socioeconomic Status With Life's Essential 8 Varies by Race and Ethnicity
Source: PubMed Central journal article supplement — J Am Heart Assoc. 2023 Sep 13;12(18):e029254. doi: 10.1161/JAHA.122.029254 (PMC10547287; doi:10.1161/jaha.122.029254), 2023-09-13
Supplement: JAH3-12-e029254-s001.pdf [file JAH3-12-e029254-s001.pdf]

# **SUPPLEMENTAL MATERIAL**

**Table S1. Comparison of included participants and participants excluded due to missing values in the data.**

|                              | Included |       |    | Excluded |        |    |
|------------------------------|----------|-------|----|----------|--------|----|
|                              | Obs      | n     | %  | Obs      | n      | %  |
| <b>Age</b>                   |          |       |    |          |        |    |
| <b>20-30</b>                 | 2378     | 38 M  | 20 | 918      | 7.0 M  | 21 |
| <b>31-50</b>                 | 4437     | 65 M  | 34 | 1638     | 12 M   | 35 |
| <b>51-65</b>                 | 3719     | 53 M  | 28 | 1262     | 8.2 M  | 24 |
| <b>66+</b>                   | 2995     | 34 M  | 18 | 1070     | 6.7 M  | 20 |
| <b>Race and Ethnicity</b>    |          |       |    |          |        |    |
| <b>Hispanic</b>              | 3163     | 28 M  | 15 | 1387     | 6.4 M  | 19 |
| <b>NH Asian</b>              | 1470     | 10 M  | 5  | 740      | 2.7 M  | 8  |
| <b>NH Black</b>              | 3069     | 20 M  | 11 | 1268     | 6.1 M  | 18 |
| <b>NH White</b>              | 5827     | 130 M | 69 | 1493     | 19 M   | 55 |
| <b>Income / Poverty Line</b> |          |       |    |          |        |    |
| <b>0.00 – 1.00</b>           | 2754     | 26 M  | 14 | 892      | 3.9 M  | 21 |
| <b>1.01 – 2.00</b>           | 3588     | 39 M  | 21 | 850      | 4.0 M  | 22 |
| <b>2.01 – 3.00</b>           | 2066     | 29 M  | 15 | 481      | 2.7 M  | 15 |
| <b>3.01 – 4.00</b>           | 1531     | 25 M  | 13 | 302      | 1.8 M  | 10 |
| <b>4.01 – 5.00</b>           | 3590     | 72 M  | 38 | 699      | 5.8 M  | 32 |
| <b>Employment Status</b>     |          |       |    |          |        |    |
| <b>Disabled/Health</b>       | 1188     | 13 M  | 7  | 531      | 3.9 M  | 12 |
| <b>Employed</b>              | 7664     | 120 M | 63 | 2676     | 18 M   | 53 |
| <b>Homemaker</b>             | 806      | 10 M  | 5  | 413      | 3.3 M  | 10 |
| <b>Retired</b>               | 2671     | 33 M  | 17 | 854      | 5.7 M  | 17 |
| <b>Student</b>               | 243      | 3.1 M | 2  | 64       | 0.48 M | 1  |
| <b>Unemployed</b>            | 957      | 12 M  | 6  | 329      | 2.3 M  | 7  |
| <b>Education</b>             |          |       |    |          |        |    |
| <b>HS</b>                    | 5592     | 66 M  | 35 | 2478     | 14 M   | 41 |
| <b>Some College</b>          | 4300     | 62 M  | 32 | 1347     | 9.8 M  | 29 |
| <b>College+</b>              | 3637     | 62 M  | 33 | 1048     | 10 M   | 30 |
| <b>Health Insurance</b>      |          |       |    |          |        |    |
| <b>Combination</b>           | 2108     | 27 M  | 14 | 654      | 5.4 M  | 16 |
| <b>Medicaid</b>              | 1098     | 11 M  | 6  | 507      | 2.9 M  | 9  |
| <b>Medicare</b>              | 1208     | 13 M  | 7  | 495      | 2.6 M  | 8  |
| <b>Military</b>              | 247      | 3.3 M | 2  | 61       | 0.76 M | 2  |
| <b>Other</b>                 | 773      | 9.8 M | 5  | 260      | 1.7 M  | 5  |
| <b>Private</b>               | 5628     | 97 M  | 51 | 1796     | 14 M   | 41 |
| <b>Uninsured</b>             | 2467     | 29 M  | 16 | 1019     | 5.9 M  | 18 |
| <b>Sex</b>                   |          |       |    |          |        |    |
| <b>Female</b>                | 6990     | 97 M  | 51 | 2567     | 19 M   | 58 |
| <b>Male</b>                  | 6539     | 93 M  | 49 | 2321     | 14 M   | 42 |
| <b>LE8 Score</b>             |          |       |    |          |        |    |
| <b>Low (0-49)</b>            | 2752     | 32 M  | 17 | 256      | 2.4 M  | 17 |
| <b>Moderate (50-79)</b>      | 8620     | 120 M | 63 | 863      | 9.2 M  | 64 |
| <b>High (80-100)</b>         | 2157     | 39 M  | 20 | 175      | 2.6 M  | 19 |

% - weighted percent, Disabled/Health – people out of work because of disability or health reasons, HS – high school, LE8 – Life’s Essential 8, M – numbers in millions, n – weighted number of Americans represented by observations, NH – non-Hispanic, NHANES – National Health and Nutrition Examination Survey, Obs – observations

**Table S2. Caloric targets for each age/sex group used to adjust dietary intake values when calculating the Dietary**

**Approaches to Stop Hypertension score.**

| <b><u>Age</u></b> | <b><u>Males</u></b> | <b><u>Females</u></b> |
|-------------------|---------------------|-----------------------|
| 2-4 years         | 1300 kilocalories   | 1200 kilocalories     |
| 5-8 years         | 1600 kilocalories   | 1500 kilocalories     |
| 9-13 years        | 2100 kilocalories   | 1800 kilocalories     |
| 14-18 years       | 2600 kilocalories   | 2100 kilocalories     |
| 19-30 years       | 2700 kilocalories   | 2100 kilocalories     |
| 31-59 years       | 2600 kilocalories   | 1900 kilocalories     |
| 60 or more years  | 2300 kilocalories   | 1900 kilocalories     |

Intake of each Dietary Approaches to Stop Hypertension score food category was multiplied by the caloric target for the relevant age/sex group then divided by actual calories consumed.

**Table S3. Number of NHANES observations, weighted n, and weighted percentages by SES variables, racial and ethnic group, and Life's Essential 8 score category.**

| <b>Hispanic Americans</b>           |                   |          |          |                         |          |          |                      |          |          |
|-------------------------------------|-------------------|----------|----------|-------------------------|----------|----------|----------------------|----------|----------|
|                                     | <b>Low (0-49)</b> |          |          | <b>Moderate (50-79)</b> |          |          | <b>High (80-100)</b> |          |          |
|                                     | <b>Obs</b>        | <b>n</b> | <b>%</b> | <b>Obs</b>              | <b>n</b> | <b>%</b> | <b>Obs</b>           | <b>n</b> | <b>%</b> |
| <b>Age</b>                          |                   |          |          |                         |          |          |                      |          |          |
| 20-30                               | 43                | 0.55 M   | 7        | 383                     | 5 M      | 63       | 166                  | 2.4 M    | 30       |
| 31-50                               | 173               | 2 M      | 16       | 737                     | 7.8 M    | 65       | 185                  | 2.2 M    | 18       |
| 51-65                               | 257               | 1.4 M    | 25       | 640                     | 4 M      | 70       | 58                   | 0.27 M   | 5        |
| 66+                                 | 142               | 0.6 M    | 26       | 359                     | 1.6 M    | 69       | 21                   | 0.11 M   | 5        |
| <b>Income / Poverty Line</b>        |                   |          |          |                         |          |          |                      |          |          |
| 0.00 – 1.00                         | 211               | 1.3 M    | 19       | 593                     | 4.7 M    | 67       | 95                   | 1 M      | 14       |
| 1.01 – 2.00                         | 196               | 1.5 M    | 18       | 670                     | 5.7 M    | 66       | 111                  | 1.4 M    | 16       |
| 2.01 – 3.00                         | 87                | 0.7 M    | 16       | 349                     | 3 M      | 69       | 67                   | 0.67 M   | 15       |
| 3.01 – 4.00                         | 55                | 0.46 M   | 14       | 210                     | 2.3 M    | 68       | 45                   | 0.61 M   | 18       |
| 4.01 – 5.00                         | 66                | 0.53 M   | 12       | 297                     | 2.8 M    | 60       | 112                  | 1.3 M    | 28       |
| <b>Employment Status</b>            |                   |          |          |                         |          |          |                      |          |          |
| Disabled/Health                     | 116               | 0.81 M   | 41       | 141                     | 1.1 M    | 54       | 13                   | 0.094 M  | 5        |
| Employed                            | 300               | 2.6 M    | 14       | 1269                    | 12 M     | 66       | 295                  | 3.7 M    | 20       |
| Homemaker                           | 49                | 0.25 M   | 11       | 208                     | 1.6 M    | 68       | 57                   | 0.47 M   | 21       |
| Retired                             | 97                | 0.46 M   | 23       | 297                     | 1.4 M    | 71       | 24                   | 0.12 M   | 6        |
| Student                             | 5                 | 0.05 M   | 8        | 26                      | 0.3 M    | 50       | 14                   | 0.24 M   | 41       |
| Unemployed                          | 48                | 0.37 M   | 16       | 178                     | 1.7 M    | 72       | 27                   | 0.29 M   | 13       |
| <b>Education Level</b>              |                   |          |          |                         |          |          |                      |          |          |
| HS or less                          | 424               | 3.1 M    | 20       | 1318                    | 11 M     | 69       | 163                  | 1.7 M    | 11       |
| Some College                        | 135               | 1.1 M    | 13       | 554                     | 5.4 M    | 66       | 144                  | 1.8 M    | 21       |
| College+                            | 56                | 0.39 M   | 9        | 246                     | 2.3 M    | 54       | 123                  | 1.5 M    | 36       |
| <b>Health Insurance</b>             |                   |          |          |                         |          |          |                      |          |          |
| Combination                         | 91                | 0.47 M   | 28       | 197                     | 1.1 M    | 64       | 19                   | 0.13 M   | 8        |
| Medicaid                            | 60                | 0.4 M    | 16       | 206                     | 1.8 M    | 71       | 28                   | 0.32 M   | 13       |
| Medicare                            | 80                | 0.37 M   | 32       | 172                     | 0.71 M   | 61       | 14                   | 0.084 M  | 7        |
| Military                            | 10                | 0.097 M  | 37       | 15                      | 0.14 M   | 52       | 3                    | 0.03 M   | 11       |
| Other                               | 32                | 0.22 M   | 12       | 147                     | 1.2 M    | 64       | 35                   | 0.44 M   | 24       |
| Private                             | 176               | 1.4 M    | 13       | 702                     | 7.1 M    | 63       | 207                  | 2.6 M    | 24       |
| Uninsured                           | 166               | 1.5 M    | 17       | 680                     | 6.5 M    | 69       | 124                  | 1.3 M    | 14       |
| <b>Sex</b>                          |                   |          |          |                         |          |          |                      |          |          |
| Female                              | 276               | 1.8 M    | 13       | 1108                    | 9 M      | 65       | 298                  | 3.1 M    | 23       |
| Male                                | 339               | 2.8 M    | 20       | 1011                    | 9.4 M    | 67       | 132                  | 1.8 M    | 13       |
| <b>Non-Hispanic Asian Americans</b> |                   |          |          |                         |          |          |                      |          |          |
|                                     | <b>Low (0-49)</b> |          |          | <b>Moderate (50-79)</b> |          |          | <b>High (80-100)</b> |          |          |
|                                     | <b>Obs</b>        | <b>n</b> | <b>%</b> | <b>Obs</b>              | <b>n</b> | <b>%</b> | <b>Obs</b>           | <b>n</b> | <b>%</b> |
| <b>Age</b>                          |                   |          |          |                         |          |          |                      |          |          |
| 20-30                               | 8                 | 0.047 M  | 2        | 146                     | 1.2 M    | 47       | 174                  | 1.3 M    | 51       |
| 31-50                               | 43                | 0.31 M   | 8        | 356                     | 2.5 M    | 62       | 191                  | 1.2 M    | 30       |
| 51-65                               | 42                | 0.30 M   | 12       | 275                     | 1.7 M    | 72       | 61                   | 0.38 M   | 16       |
| 66+                                 | 18                | 0.072 M  | 7        | 131                     | 0.81 M   | 77       | 25                   | 0.16 M   | 16       |
| <b>Income / Poverty Line</b>        |                   |          |          |                         |          |          |                      |          |          |
| 0.00 – 1.00                         | 21                | 0.16 M   | 12       | 100                     | 0.80 M   | 60       | 48                   | 0.36 M   | 27       |
| 1.01 – 2.00                         | 30                | 0.15 M   | 10       | 137                     | 0.99 M   | 69       | 42                   | 0.29 M   | 20       |
| 2.01 – 3.00                         | 15                | 0.12 M   | 8        | 137                     | 0.95 M   | 69       | 52                   | 0.30 M   | 22       |
| 3.01 – 4.00                         | 17                | 0.11 M   | 7        | 133                     | 0.93 M   | 60       | 72                   | 0.53 M   | 34       |
| 4.01 – 5.00                         | 28                | 0.19 M   | 4        | 401                     | 2.6 M    | 59       | 237                  | 1.6 M    | 37       |
| <b>Employment Status</b>            |                   |          |          |                         |          |          |                      |          |          |

|                         |    |          |    |     |        |    |     |         |    |
|-------------------------|----|----------|----|-----|--------|----|-----|---------|----|
| Disabled/Health         | 7  | 0.039 M  | 21 | 15  | 0.11 M | 61 | 5   | 0.033 M | 18 |
| Employed                | 68 | 0.43 M   | 6  | 620 | 4.4 M  | 62 | 326 | 2.2 M   | 32 |
| Homemaker               | 7  | 0.090 M  | 10 | 78  | 0.52 M | 61 | 39  | 0.24 M  | 29 |
| Retired                 | 16 | 0.080 M  | 8  | 123 | 0.75 M | 77 | 21  | 0.15 M  | 15 |
| Student                 | 2  | 0.0043 M | 1  | 32  | 0.24 M | 50 | 30  | 0.24 M  | 50 |
| Unemployed              | 11 | 0.079 M  | 14 | 40  | 0.28 M | 49 | 30  | 0.21 M  | 37 |
| <b>Education Level</b>  |    |          |    |     |        |    |     |         |    |
| HS or less              | 43 | 0.28 M   | 14 | 181 | 1.4 M  | 70 | 40  | 0.31 M  | 16 |
| Some College            | 33 | 0.24 M   | 11 | 195 | 1.4 M  | 63 | 73  | 0.56 M  | 26 |
| College+                | 35 | 0.21 M   | 4  | 532 | 3.5 M  | 59 | 338 | 2.2 M   | 37 |
| <b>Health Insurance</b> |    |          |    |     |        |    |     |         |    |
| Combination             | 12 | 0.051 M  | 9  | 58  | 0.37 M | 69 | 13  | 0.11 M  | 21 |
| Medicaid                | 8  | 0.064 M  | 11 | 58  | 0.37 M | 64 | 15  | 0.14 M  | 25 |
| Medicare                | 9  | 0.044 M  | 9  | 63  | 0.41 M | 82 | 9   | 0.044 M | 9  |
| Military                | 0  | 0 M      | 0  | 11  | 0.11 M | 77 | 3   | 0.033 M | 23 |
| Other                   | 7  | 0.058 M  | 8  | 59  | 0.5 M  | 68 | 23  | 0.18 M  | 24 |
| Private                 | 52 | 0.34 M   | 5  | 536 | 3.6 M  | 58 | 338 | 2.3 M   | 37 |
| Uninsured               | 23 | 0.17 M   | 12 | 123 | 0.93 M | 67 | 50  | 0.29 M  | 21 |
| <b>Sex</b>              |    |          |    |     |        |    |     |         |    |
| Female                  | 41 | 0.32 M   | 6  | 422 | 3.0 M  | 58 | 265 | 1.8 M   | 36 |
| Male                    | 70 | 0.41 M   | 8  | 486 | 3.3 M  | 67 | 186 | 1.2 M   | 25 |

### Non-Hispanic Black Americans

|                              | Low (0-49) |         |    | Moderate (50-79) |        |    | High (80-100) |         |    |
|------------------------------|------------|---------|----|------------------|--------|----|---------------|---------|----|
|                              | Obs        | n       | %  | Obs              | n      | %  | Obs           | n       | %  |
| <b>Age</b>                   |            |         |    |                  |        |    |               |         |    |
| 20-30                        | 55         | 0.38 M  | 7  | 391              | 3.7 M  | 71 | 119           | 1.1 M   | 21 |
| 31-50                        | 240        | 1.8 M   | 25 | 623              | 4.8 M  | 65 | 95            | 0.72 M  | 10 |
| 51-65                        | 347        | 2.0 M   | 37 | 599              | 3.3 M  | 60 | 36            | 0.14 M  | 3  |
| 66+                          | 181        | 0.73 M  | 31 | 352              | 1.5 M  | 62 | 33            | 0.15 M  | 6  |
| <b>Income / Poverty Line</b> |            |         |    |                  |        |    |               |         |    |
| 0.00 – 1.00                  | 274        | 1.7 M   | 32 | 451              | 3.2 M  | 61 | 47            | 0.37 M  | 7  |
| 1.01 – 2.00                  | 248        | 1.4 M   | 26 | 504              | 3.5 M  | 64 | 69            | 0.54 M  | 10 |
| 2.01 – 3.00                  | 126        | 0.75 M  | 24 | 332              | 2.0 M  | 65 | 42            | 0.33 M  | 11 |
| 3.01 – 4.00                  | 77         | 0.46 M  | 20 | 228              | 1.5 M  | 68 | 40            | 0.27 M  | 12 |
| 4.01 – 5.00                  | 98         | 0.65 M  | 16 | 450              | 2.9 M  | 70 | 85            | 0.6 M   | 15 |
| <b>Employment Status</b>     |            |         |    |                  |        |    |               |         |    |
| Disabled/Health              | 171        | 0.99 M  | 47 | 170              | 1.1 M  | 51 | 4             | 0.025 M | 1  |
| Employed                     | 369        | 2.5 M   | 20 | 1175             | 8.4 M  | 68 | 194           | 1.5 M   | 12 |
| Homemaker                    | 25         | 0.16 M  | 26 | 63               | 0.4 M  | 65 | 7             | 0.052 M | 9  |
| Retired                      | 171        | 0.73 M  | 31 | 337              | 1.5 M  | 63 | 31            | 0.14 M  | 6  |
| Student                      | 5          | 0.027 M | 6  | 40               | 0.31 M | 63 | 19            | 0.16 M  | 31 |
| Unemployed                   | 82         | 0.53 M  | 24 | 180              | 1.4 M  | 64 | 28            | 0.27 M  | 12 |
| <b>Education Level</b>       |            |         |    |                  |        |    |               |         |    |
| HS or less                   | 476        | 2.9 M   | 33 | 800              | 5.2 M  | 61 | 61            | 0.47 M  | 6  |
| Some College                 | 253        | 1.5 M   | 20 | 749              | 5.2 M  | 69 | 111           | 0.85 M  | 11 |
| College+                     | 93         | 0.58 M  | 14 | 415              | 2.7 M  | 67 | 111           | 0.78 M  | 19 |
| <b>Health Insurance</b>      |            |         |    |                  |        |    |               |         |    |
| Combination                  | 137        | 0.63 M  | 32 | 273              | 1.3 M  | 64 | 18            | 0.076 M | 4  |
| Medicaid                     | 120        | 0.84 M  | 29 | 223              | 1.7 M  | 59 | 35            | 0.32 M  | 11 |
| Medicare                     | 100        | 0.4 M   | 32 | 159              | 0.72 M | 59 | 17            | 0.11 M  | 9  |
| Military                     | 22         | 0.18 M  | 31 | 58               | 0.35 M | 60 | 6             | 0.048 M | 8  |
| Other                        | 49         | 0.32 M  | 22 | 133              | 0.95 M | 66 | 21            | 0.17 M  | 12 |
| Private                      | 234        | 1.5 M   | 19 | 764              | 5.2 M  | 67 | 142           | 1.0 M   | 13 |
| Uninsured                    | 161        | 1.1 M   | 25 | 355              | 2.9 M  | 68 | 44            | 0.34 M  | 8  |
| <b>Sex</b>                   |            |         |    |                  |        |    |               |         |    |
| Female                       | 402        | 2.5 M   | 22 | 1057             | 7.4 M  | 67 | 167           | 1.2 M   | 11 |

|                                     |                   |          |          |                         |          |          |                      |          |          |
|-------------------------------------|-------------------|----------|----------|-------------------------|----------|----------|----------------------|----------|----------|
| Male                                | 421               | 2.5 M    | 27       | 908                     | 5.7 M    | 63       | 116                  | 0.90 M   | 10       |
| <b>Non-Hispanic White Americans</b> |                   |          |          |                         |          |          |                      |          |          |
|                                     | <b>Low (0-49)</b> |          |          | <b>Moderate (50-79)</b> |          |          | <b>High (80-100)</b> |          |          |
|                                     | <b>Obs</b>        | <b>n</b> | <b>%</b> | <b>Obs</b>              | <b>n</b> | <b>%</b> | <b>Obs</b>           | <b>n</b> | <b>%</b> |
| <b>Age</b>                          |                   |          |          |                         |          |          |                      |          |          |
| 20-30                               | 84                | 1.4 M    | 6        | 538                     | 14 M     | 61       | 271                  | 7.5 M    | 33       |
| 31-50                               | 376               | 6.1 M    | 15       | 1045                    | 25 M     | 59       | 373                  | 11 M     | 26       |
| 51-65                               | 395               | 9.6 M    | 24       | 828                     | 23 M     | 58       | 181                  | 6.9 M    | 18       |
| 66+                                 | 349               | 4.5 M    | 16       | 1219                    | 21 M     | 72       | 168                  | 3.3 M    | 12       |
| <b>Income / Poverty Line</b>        |                   |          |          |                         |          |          |                      |          |          |
| 0.00 – 1.00                         | 331               | 4.1 M    | 32       | 495                     | 6.9 M    | 54       | 89                   | 1.9 M    | 14       |
| 1.01 – 2.00                         | 433               | 6 M      | 25       | 1005                    | 15 M     | 62       | 144                  | 2.9 M    | 12       |
| 2.01 – 3.00                         | 175               | 3.3 M    | 17       | 565                     | 13 M     | 67       | 120                  | 3.2 M    | 16       |
| 3.01 – 4.00                         | 101               | 2.6 M    | 15       | 418                     | 11 M     | 61       | 135                  | 4.2 M    | 24       |
| 4.01 – 5.00                         | 164               | 5.5 M    | 9        | 1147                    | 37 M     | 62       | 505                  | 16 M     | 28       |
| <b>Employment Status</b>            |                   |          |          |                         |          |          |                      |          |          |
| Disabled/Health                     | 273               | 4.3 M    | 49       | 254                     | 4.0 M    | 46       | 20                   | 0.40 M   | 5        |
| Employed                            | 495               | 11 M     | 13       | 1889                    | 50 M     | 62       | 664                  | 20 M     | 25       |
| Homemaker                           | 52                | 1.0 M    | 17       | 141                     | 2.8 M    | 45       | 80                   | 2.4 M    | 38       |
| Retired                             | 313               | 4.5 M    | 16       | 1090                    | 20 M     | 72       | 152                  | 3.2 M    | 12       |
| Student                             | 4                 | 0.043 M  | 3        | 36                      | 0.70 M   | 45       | 30                   | 0.83 M   | 53       |
| Unemployed                          | 67                | 1.0 M    | 15       | 220                     | 4.1 M    | 62       | 47                   | 1.5 M    | 22       |
| <b>Education Level</b>              |                   |          |          |                         |          |          |                      |          |          |
| HS or less                          | 650               | 11 M     | 27       | 1315                    | 26 M     | 65       | 121                  | 2.9 M    | 7        |
| Some College                        | 444               | 7.9 M    | 18       | 1325                    | 28 M     | 65       | 284                  | 7.5 M    | 17       |
| College+                            | 110               | 2.7 M    | 6        | 990                     | 27 M     | 57       | 588                  | 18 M     | 38       |
| <b>Health Insurance</b>             |                   |          |          |                         |          |          |                      |          |          |
| Combination                         | 298               | 4.1 M    | 18       | 862                     | 15 M     | 69       | 132                  | 2.9 M    | 13       |
| Medicaid                            | 124               | 1.8 M    | 34       | 195                     | 2.9 M    | 54       | 26                   | 0.67 M   | 12       |
| Medicare                            | 136               | 2.0 M    | 20       | 404                     | 7.0 M    | 71       | 46                   | 0.85 M   | 9        |
| Military                            | 29                | 0.42 M   | 18       | 77                      | 1.4 M    | 60       | 13                   | 0.50 M   | 22       |
| Other                               | 50                | 1.0 M    | 17       | 174                     | 3.8 M    | 64       | 43                   | 1.1 M    | 18       |
| Private                             | 344               | 8.5 M    | 12       | 1480                    | 43 M     | 60       | 653                  | 20 M     | 28       |
| Uninsured                           | 223               | 3.7 M    | 25       | 438                     | 8.6 M    | 60       | 80                   | 2.2 M    | 15       |
| <b>Sex</b>                          |                   |          |          |                         |          |          |                      |          |          |
| Female                              | 552               | 9.8 M    | 15       | 1769                    | 39 M     | 58       | 633                  | 18 M     | 27       |
| Male                                | 652               | 12 M     | 18       | 1861                    | 43 M     | 66       | 360                  | 10 M     | 16       |

% - weighted percent, Disabled/Health – people out of work because of disability or health reasons, HS – high school, LE8 – Life’s Essential 8, M – numbers in millions, n – weighted number of Americans represented by observations, NH – non-Hispanic, NHANES – National Health and Nutrition Examination Survey, Obs – observations, SES – socioeconomic status.

Table S4. The association of socioeconomic status with Life's Essential 8 score by race and ethnic group, excluding NHANES participants with missing data

(final n=13,529).

| Education                  |          | Unadjusted Models         |        | Age-Adjusted Models       |        | Multivariable Models      |        |
|----------------------------|----------|---------------------------|--------|---------------------------|--------|---------------------------|--------|
| Level                      | Group    | Beta (CI) p               | Int.p  | Beta (CI) p               | Int.p  | Beta (CI) p               | Int.p  |
| HS or less vs College+     | Hispanic | 10.3 (7.7, 13.0) p<0.001  | 0.001  | 10.0 (7.5, 12.5) p<0.001  | 0.001  | 6.9 (4.3, 9.4) p<0.001    | <0.001 |
| HS or less vs College+     | NH Asian | 8.5 (5.6, 11.5) p<0.001   | <0.001 | 7.7 (5.0, 10.5) p<0.001   | <0.001 | 4.9 (2.2, 7.5) p=0.001    | <0.001 |
| HS or less vs College+     | NH Black | 9.8 (7.6, 11.9) p<0.001   | <0.001 | 9.7 (7.8, 11.7) p<0.001   | <0.001 | 5.6 (3.6, 7.6) p<0.001    | <0.001 |
| HS or less vs College+     | NH White | 15.8 (14.3, 17.3) p<0.001 | Ref    | 15.4 (13.9, 16.8) p<0.001 | Ref    | 12.6 (11.3, 13.9) p<0.001 | Ref    |
| HS or less vs Some College | Hispanic | 5.1 (3.3, 6.9) p<0.001    | 0.342  | 4.1 (2.4, 5.8) p<0.001    | 0.179  | 2.1 (0.5, 3.7) p=0.011    | 0.040  |
| HS or less vs Some College | NH Asian | 3.3 (-0.1, 6.8) p=0.058   | 0.122  | 2.1 (-1.3, 5.6) p=0.223   | 0.059  | -0.3 (-3.4, 2.8) p=0.857  | 0.008  |
| HS or less vs Some College | NH Black | 4.8 (3.0, 6.7) p<0.001    | 0.197  | 4.1 (2.6, 5.6) p<0.001    | 0.089  | 1.6 (0.2, 3.0) p=0.027    | 0.003  |
| HS or less vs Some College | NH White | 6.1 (4.8, 7.5) p<0.001    | Ref    | 5.6 (4.3, 6.8) p<0.001    | Ref    | 4.2 (3.1, 5.3) p<0.001    | Ref    |

  

| Income / Poverty Line |          | Unadjusted Models      |        | Age-Adjusted Models    |       | Multivariable Models    |       |
|-----------------------|----------|------------------------|--------|------------------------|-------|-------------------------|-------|
| Continuous            | Group    | Beta (CI) p            | Int.p  | Beta (CI) p            | Int.p | Beta (CI) p             | Int.p |
| Income/Poverty Line   | Hispanic | 1.4 (1.0, 1.9) p<0.001 | 0.001  | 1.6 (1.1, 2.1) p<0.001 | 0.001 | 0.2 (-0.3, 0.7) p=0.374 | 0.001 |
| Income/Poverty Line   | NH Asian | 1.4 (0.8, 2.1) p<0.001 | 0.003  | 1.5 (0.9, 2.2) p<0.001 | 0.001 | 0.1 (-0.5, 0.8) p=0.661 | 0.001 |
| Income/Poverty Line   | NH Black | 1.4 (1.0, 1.9) p<0.001 | <0.001 | 1.8 (1.4, 2.2) p<0.001 | 0.001 | 0.3 (-0.2, 0.9) p=0.173 | 0.001 |
| Income/Poverty Line   | NH White | 2.6 (2.2, 3.1) p<0.001 | Ref    | 2.9 (2.4, 3.3) p<0.001 | Ref   | 1.4 (1.0, 1.8) p<0.001  | Ref   |

  

| Employment Status           |          | Unadjusted Models            |       | Age-Adjusted Models          |        | Multivariable Models        |       |
|-----------------------------|----------|------------------------------|-------|------------------------------|--------|-----------------------------|-------|
| Level                       | Group    | Beta (CI) p                  | Int.p | Beta (CI) p                  | Int.p  | Beta (CI) p                 | Int.p |
| Employed vs Disabled/Health | Hispanic | -11.2 (-13.9, -8.6) p<0.001  | 0.003 | -8.1 (-10.8, -5.4) p<0.001   | 0.001  | -6.2 (-8.8, -3.6) p<0.001   | 0.032 |
| Employed vs Disabled/Health | NH Asian | -9.4 (-16.7, -2.0) p=0.014   | 0.044 | -6.4 (-13.3, 0.4) p=0.065    | 0.018  | -4.1 (-8.9, 0.6) p=0.084    | 0.030 |
| Employed vs Disabled/Health | NH Black | -10.7 (-13.0, -8.4) p<0.001  | 0.001 | -8.2 (-10.5, -6.0) p<0.001   | <0.001 | -4.1 (-6.2, -1.9) p=0.001   | 0.001 |
| Employed vs Disabled/Health | NH White | -17.1 (-19.6, -14.6) p<0.001 | Ref   | -15.1 (-17.7, -12.5) p<0.001 | Ref    | -10.1 (-12.8, -7.5) p<0.001 | Ref   |
| Employed vs Homemaker       | Hispanic | 0.7 (-1.4, 2.9) p=0.496      | 0.575 | 1.6 (-0.4, 3.5) p=0.114      | 0.951  | 1.7 (-0.4, 3.8) p=0.103     | 0.576 |
| Employed vs Homemaker       | NH Asian | -0.3 (-3.5, 2.9) p=0.848     | 0.305 | 0.4 (-2.5, 3.3) p=0.773      | 0.581  | -1.0 (-4.0, 2.0) p=0.498    | 0.301 |
| Employed vs Homemaker       | NH Black | -3.2 (-7.7, 1.2) p=0.150     | 0.099 | -4.4 (-8.9, 0.0) p=0.052     | 0.052  | -0.9 (-4.9, 3.1) p=0.662    | 0.523 |
| Employed vs Homemaker       | NH White | 1.8 (-1.1, 4.7) p=0.214      | Ref   | 1.4 (-1.3, 4.2) p=0.299      | Ref    | 0.7 (-1.7, 3.1) p=0.533     | Ref   |
| Employed vs Retired         | Hispanic | -6.2 (-8.3, -4.1) p<0.001    | 0.193 | 0.4 (-1.7, 2.5) p=0.696      | 0.350  | 0.1 (-2.1, 2.3) p=0.922     | 0.139 |

|                               |          |                           |       |                           |       |                          |       |
|-------------------------------|----------|---------------------------|-------|---------------------------|-------|--------------------------|-------|
| <b>Employed vs Retired</b>    | NH Asian | -4.5 (-7.3, -1.6) p=0.003 | 0.879 | 1.9 (-0.9, 4.6) p=0.177   | 0.803 | 2.9 (-0.5, 6.3) p=0.094  | 0.568 |
| <b>Employed vs Retired</b>    | NH Black | -5.3 (-7.2, -3.4) p<0.001 | 0.562 | 1.2 (-0.9, 3.3) p=0.256   | 0.773 | 2.0 (-0.1, 4.1) p=0.060  | 0.940 |
| <b>Employed vs Retired</b>    | NH White | -4.7 (-6.1, -3.3) p<0.001 | Ref   | 1.5 (-0.3, 3.3) p=0.106   | Ref   | 1.9 (0.3, 3.5) p=0.018   | Ref   |
| <b>Employed vs Student</b>    | Hispanic | 6.7 (1.8, 11.5) p=0.008   | 0.329 | 3.6 (-1.3, 8.5) p=0.148   | 0.469 | 2.1 (-2.8, 7.1) p=0.386  | 0.159 |
| <b>Employed vs Student</b>    | NH Asian | 7.1 (3.2, 11.0) p=0.001   | 0.345 | 3.5 (-0.5, 7.4) p=0.086   | 0.406 | 5.2 (1.4, 9.0) p=0.010   | 0.556 |
| <b>Employed vs Student</b>    | NH Black | 9.8 (4.5, 15.1) p=0.001   | 0.945 | 6.6 (2.0, 11.1) p=0.006   | 0.828 | 8.1 (3.7, 12.6) p=0.001  | 0.692 |
| <b>Employed vs Student</b>    | NH White | 10.0 (4.6, 15.5) p=0.001  | Ref   | 6.0 (1.1, 10.9) p=0.018   | Ref   | 7.0 (1.8, 12.2) p=0.010  | Ref   |
| <b>Employed vs Unemployed</b> | Hispanic | -3.6 (-6.3, -0.9) p=0.009 | 0.101 | -3.7 (-6.3, -1.2) p=0.006 | 0.088 | -2.0 (-4.4, 0.4) p=0.105 | 0.109 |
| <b>Employed vs Unemployed</b> | NH Asian | -1.4 (-6.3, 3.6) p=0.585  | 0.864 | -2.0 (-7.0, 3.0) p=0.428  | 0.678 | -1.6 (-6.3, 3.1) p=0.485 | 0.363 |
| <b>Employed vs Unemployed</b> | NH Black | -0.3 (-2.8, 2.2) p=0.813  | 0.671 | -0.9 (-3.2, 1.5) p=0.453  | 0.985 | 2.4 (0.4, 4.5) p=0.020   | 0.143 |
| <b>Employed vs Unemployed</b> | NH White | -0.9 (-3.0, 1.2) p=0.384  | Ref   | -0.9 (-3.2, 1.4) p=0.428  | Ref   | 0.6 (-1.5, 2.7) p=0.561  | Ref   |

| <b>Health Insurance</b>       |              | <b>Unadjusted Models</b>    |              | <b>Age-Adjusted Models</b>  |              | <b>Multivariable Models</b> |              |
|-------------------------------|--------------|-----------------------------|--------------|-----------------------------|--------------|-----------------------------|--------------|
| <b>Level</b>                  | <b>Group</b> | <b>Beta (CI) p</b>          | <b>Int.p</b> | <b>Beta (CI) p</b>          | <b>Int.p</b> | <b>Beta (CI) p</b>          | <b>Int.p</b> |
| <b>Private vs Combination</b> | Hispanic     | -9.6 (-12.7, -6.4) p<0.001  | 0.057        | -2.5 (-6.1, 1.1) p=0.163    | 0.089        | 2.6 (-1.0, 6.2) p=0.146     | 0.749        |
| <b>Private vs Combination</b> | NH Asian     | -5.6 (-10.1, -1.0) p=0.018  | 0.803        | 1.5 (-3.0, 6.1) p=0.491     | 0.756        | 4.0 (-0.6, 8.6) p=0.088     | 0.753        |
| <b>Private vs Combination</b> | NH Black     | -7.2 (-9.2, -5.2) p<0.001   | 0.323        | -1.3 (-3.3, 0.6) p=0.178    | 0.067        | 3.2 (1.2, 5.1) p=0.003      | 0.974        |
| <b>Private vs Combination</b> | NH White     | -6.2 (-7.6, -4.7) p<0.001   | Ref          | 0.8 (-1.0, 2.6) p=0.363     | Ref          | 3.2 (1.8, 4.6) p<0.001      | Ref          |
| <b>Private vs Medicaid</b>    | Hispanic     | -4.8 (-7.1, -2.4) p<0.001   | 0.003        | -4.8 (-6.9, -2.7) p<0.001   | <0.001       | 0.1 (-2.4, 2.5) p=0.937     | 0.014        |
| <b>Private vs Medicaid</b>    | NH Asian     | -5.0 (-10.8, 0.8) p=0.089   | 0.045        | -5.0 (-10.1, 0.1) p=0.054   | 0.007        | 2.8 (-3.1, 8.6) p=0.338     | 0.022        |
| <b>Private vs Medicaid</b>    | NH Black     | -4.1 (-6.4, -1.8) p=0.001   | 0.003        | -5.9 (-8.1, -3.6) p<0.001   | 0.003        | 0.4 (-1.8, 2.6) p=0.714     | 0.015        |
| <b>Private vs Medicaid</b>    | NH White     | -11.4 (-14.9, -7.8) p<0.001 | Ref          | -12.8 (-16.0, -9.6) p<0.001 | Ref          | -4.3 (-7.1, -1.5) p=0.004   | Ref          |
| <b>Private vs Medicare</b>    | Hispanic     | -9.9 (-12.4, -7.3) p<0.001  | 0.607        | -2.8 (-5.3, -0.3) p=0.029   | 0.732        | 3.4 (0.5, 6.2) p=0.024      | 0.336        |
| <b>Private vs Medicare</b>    | NH Asian     | -7.8 (-10.6, -5.0) p<0.001  | 0.466        | 0.2 (-2.5, 3.0) p=0.870     | 0.148        | 3.2 (0.8, 5.7) p=0.013      | 0.328        |
| <b>Private vs Medicare</b>    | NH Black     | -6.2 (-8.3, -4.1) p<0.001   | 0.048        | -0.0 (-2.1, 2.0) p=0.969    | 0.114        | 5.4 (3.4, 7.3) p<0.001      | 0.004        |
| <b>Private vs Medicare</b>    | NH White     | -9.0 (-11.0, -7.0) p<0.001  | Ref          | -2.2 (-4.6, 0.2) p=0.066    | Ref          | 1.7 (-0.4, 3.7) p=0.105     | Ref          |
| <b>Private vs Military</b>    | Hispanic     | -10.4 (-17.3, -3.5) p=0.004 | 0.217        | -8.9 (-16.6, -1.2) p=0.024  | 0.316        | -5.9 (-12.5, 0.7) p=0.078   | 0.113        |
| <b>Private vs Military</b>    | NH Asian     | 1.6 (-5.0, 8.1) p=0.629     | 0.082        | 3.1 (-1.6, 7.8) p=0.186     | 0.019        | 6.9 (0.5, 13.4) p=0.036     | 0.033        |
| <b>Private vs Military</b>    | NH Black     | -6.0 (-11.8, -0.2) p=0.044  | 0.845        | -4.0 (-9.4, 1.5) p=0.150    | 0.879        | -1.7 (-7.0, 3.6) p=0.521    | 0.701        |
| <b>Private vs Military</b>    | NH White     | -5.2 (-10.1, -0.4) p=0.034  | Ref          | -4.5 (-9.1, 0.0) p=0.051    | Ref          | -0.4 (-3.3, 2.5) p=0.766    | Ref          |
| <b>Private vs Other</b>       | Hispanic     | 0.4 (-2.1, 3.0) p=0.729     | 0.005        | 1.0 (-1.3, 3.4) p=0.364     | 0.001        | 2.3 (-0.3, 4.9) p=0.078     | 0.012        |
| <b>Private vs Other</b>       | NH Asian     | -3.4 (-7.0, 0.2) p=0.062    | 0.260        | -2.5 (-6.5, 1.6) p=0.222    | 0.100        | 1.2 (-2.3, 4.6) p=0.492     | 0.048        |
| <b>Private vs Other</b>       | NH Black     | -0.4 (-2.8, 1.9) p=0.722    | 0.005        | -0.5 (-2.8, 1.8) p=0.689    | 0.002        | 3.2 (0.9, 5.6) p=0.010      | 0.002        |
| <b>Private vs Other</b>       | NH White     | -5.9 (-8.7, -3.0) p<0.001   | Ref          | -6.3 (-9.1, -3.5) p<0.001   | Ref          | -2.9 (-5.5, -0.3) p=0.028   | Ref          |



|                             |          |                            |       |                            |       |                           |       |
|-----------------------------|----------|----------------------------|-------|----------------------------|-------|---------------------------|-------|
| <b>Private vs Uninsured</b> | Hispanic | -4.1 (-6.2, -2.0) p<0.001  | 0.027 | -4.9 (-6.9, -2.9) p<0.001  | 0.018 | -0.5 (-2.6, 1.7) p=0.672  | 0.082 |
| <b>Private vs Uninsured</b> | NH Asian | -6.2 (-10.1, -2.3) p=0.003 | 0.452 | -6.9 (-10.6, -3.2) p=0.001 | 0.356 | -2.0 (-5.3, 1.3) p=0.221  | 0.548 |
| <b>Private vs Uninsured</b> | NH Black | -2.0 (-4.1, 0.2) p=0.068   | 0.001 | -3.6 (-5.7, -1.5) p=0.001  | 0.001 | 0.8 (-1.3, 2.8) p=0.440   | 0.015 |
| <b>Private vs Uninsured</b> | NH White | -7.8 (-10.1, -5.5) p<0.001 | Ref   | -8.7 (-10.9, -6.6) p<0.001 | Ref   | -3.0 (-4.9, -1.1) p=0.003 | Ref   |

CI – 95% confidence interval, HS – high school, Int.p – race interaction p-value, NH – non-Hispanic, NHANES – National Health and Nutrition Examination Survey. Multivariable models are adjusted for age, sex, and socioeconomic status variables not included in interaction term. Example Interpretation: there is a significantly greater magnitude of positive association of education level with Life’s Essential 8 among NHWA than other groups (likelihood ratio test p < 0.001). There is a significantly greater magnitude of positive association of income level with Life’s Essential 8 among non-Hispanic White Americans than other groups (likelihood ratio test p < 0.001). There is a significantly greater magnitude of negative association of having a disability or health issue that prevents work with Life’s Essential 8 among non-Hispanic White Americans than other groups (likelihood ratio test p < 0.001). There is a significantly greater magnitude of negative association of having Medicaid insurance with Life’s Essential 8 among non-Hispanic White Americans than other groups (likelihood ratio test p < 0.001).

Table S5. The association of socioeconomic status with Life's Essential 8 score by race and ethnic group, imputing missing data (final n=18,417).

| Education                  |          | Unadjusted Models         |        | Age-Adjusted Models       |        | Multivariable Models      |        |
|----------------------------|----------|---------------------------|--------|---------------------------|--------|---------------------------|--------|
| Level                      | Group    | Beta (CI) p               | Int.p  | Beta (CI) p               | Int.p  | Beta (CI) p               | Int.p  |
| HS or less vs College+     | Hispanic | 9.8 (7.4, 12.2) p<0.001   | <0.001 | 9.6 (7.3, 11.8) p<0.001   | <0.001 | 6.5 (4.3, 8.8) p<0.001    | <0.001 |
| HS or less vs College+     | NH Asian | 8.7 (6.4, 11.0) p<0.001   | <0.001 | 7.7 (5.5, 9.9) p<0.001    | <0.001 | 4.9 (2.8, 7.0) p<0.001    | <0.001 |
| HS or less vs College+     | NH Black | 10.1 (8.3, 11.8) p<0.001  | <0.001 | 10.1 (8.4, 11.7) p<0.001  | <0.001 | 6.1 (4.4, 7.7) p<0.001    | <0.001 |
| HS or less vs College+     | NH White | 15.3 (14.0, 16.6) p<0.001 | Ref    | 14.8 (13.6, 16.1) p<0.001 | Ref    | 12.2 (11.1, 13.3) p<0.001 | Ref    |
| HS or less vs Some College | Hispanic | 4.7 (3.1, 6.2) p<0.001    | 0.352  | 3.7 (2.2, 5.2) p<0.001    | 0.180  | 1.8 (0.3, 3.2) p=0.018    | 0.049  |
| HS or less vs Some College | NH Asian | 3.0 (0.3, 5.7) p=0.029    | 0.075  | 1.7 (-1.0, 4.4) p=0.208   | 0.027  | -0.6 (-3.1, 1.8) p=0.593  | 0.002  |
| HS or less vs Some College | NH Black | 5.0 (3.4, 6.6) p<0.001    | 0.484  | 4.2 (3.0, 5.5) p<0.001    | 0.321  | 1.8 (0.6, 3.0) p=0.006    | 0.014  |
| HS or less vs Some College | NH White | 5.5 (4.4, 6.7) p<0.001    | Ref    | 4.9 (3.9, 5.9) p<0.001    | Ref    | 3.5 (2.6, 4.5) p<0.001    | Ref    |

  

| Income / Poverty Line |          | Unadjusted Models      |        | Age-Adjusted Models    |        | Multivariable Models    |        |
|-----------------------|----------|------------------------|--------|------------------------|--------|-------------------------|--------|
| Continuous            | Group    | Beta (CI) p            | Int.p  | Beta (CI) p            | Int.p  | Beta (CI) p             | Int.p  |
| Income/Poverty Line   | Hispanic | 1.3 (0.8, 1.7) p<0.001 | <0.001 | 1.4 (1.0, 1.8) p<0.001 | <0.001 | 0.1 (-0.3, 0.6) p=0.527 | <0.001 |
| Income/Poverty Line   | NH Asian | 1.4 (0.9, 1.9) p<0.001 | 0.001  | 1.5 (1.0, 2.0) p<0.001 | <0.001 | 0.1 (-0.4, 0.6) p=0.763 | <0.001 |
| Income/Poverty Line   | NH Black | 1.3 (0.9, 1.8) p<0.001 | <0.001 | 1.7 (1.3, 2.1) p<0.001 | <0.001 | 0.3 (-0.1, 0.8) p=0.175 | <0.001 |
| Income/Poverty Line   | NH White | 2.6 (2.1, 3.0) p<0.001 | Ref    | 2.8 (2.4, 3.2) p<0.001 | Ref    | 1.3 (0.9, 1.7) p<0.001  | Ref    |

  

| Employment Status           |          | Unadjusted Models            |       | Age-Adjusted Models          |        | Multivariable Models       |       |
|-----------------------------|----------|------------------------------|-------|------------------------------|--------|----------------------------|-------|
| Level                       | Group    | Beta (CI) p                  | Int.p | Beta (CI) p                  | Int.p  | Beta (CI) p                | Int.p |
| Employed vs Disabled/Health | Hispanic | -11.3 (-13.6, -9.0) p<0.001  | 0.005 | -8.2 (-10.6, -5.8) p<0.001   | 0.001  | -6.4 (-8.9, -4.0) p<0.001  | 0.065 |
| Employed vs Disabled/Health | NH Asian | -9.3 (-14.7, -3.8) p=0.001   | 0.018 | -6.4 (-11.6, -1.2) p=0.017   | 0.006  | -2.5 (-7.0, 2.0) p=0.261   | 0.011 |
| Employed vs Disabled/Health | NH Black | -10.4 (-12.6, -8.1) p<0.001  | 0.001 | -7.9 (-10.1, -5.8) p<0.001   | <0.001 | -4.4 (-6.5, -2.2) p<0.001  | 0.003 |
| Employed vs Disabled/Health | NH White | -16.2 (-18.4, -14.0) p<0.001 | Ref   | -14.2 (-16.4, -12.0) p<0.001 | Ref    | -9.5 (-11.8, -7.2) p<0.001 | Ref   |
| Employed vs Homemaker       | Hispanic | 1.9 (-0.2, 3.9) p=0.072      | 0.620 | 2.5 (0.6, 4.4) p=0.011       | 0.246  | 2.4 (0.5, 4.2) p=0.013     | 0.137 |
| Employed vs Homemaker       | NH Asian | 0.6 (-2.1, 3.3) p=0.638      | 0.859 | 1.2 (-1.3, 3.6) p=0.341      | 0.713  | 0.1 (-2.4, 2.6) p=0.950    | 0.972 |
| Employed vs Homemaker       | NH Black | -1.5 (-5.2, 2.2) p=0.418     | 0.328 | -2.3 (-5.9, 1.4) p=0.214     | 0.264  | 0.2 (-3.1, 3.5) p=0.924    | 0.949 |
| Employed vs Homemaker       | NH White | 1.0 (-1.8, 3.8) p=0.480      | Ref   | 0.5 (-2.2, 3.1) p=0.717      | Ref    | 0.0 (-2.2, 2.3) p=0.983    | Ref   |

|                               |          |                           |       |                           |       |                          |       |
|-------------------------------|----------|---------------------------|-------|---------------------------|-------|--------------------------|-------|
| <b>Employed vs Retired</b>    | Hispanic | -5.8 (-7.4, -4.2) p<0.001 | 0.426 | 0.8 (-1.0, 2.6) p=0.364   | 0.763 | 0.5 (-1.3, 2.2) p=0.604  | 0.156 |
| <b>Employed vs Retired</b>    | NH Asian | -5.1 (-7.3, -2.8) p<0.001 | 0.943 | 1.3 (-0.9, 3.4) p=0.253   | 0.897 | 2.6 (0.0, 5.2) p=0.050   | 0.569 |
| <b>Employed vs Retired</b>    | NH Black | -4.7 (-6.3, -3.1) p<0.001 | 0.759 | 1.7 (-0.1, 3.4) p=0.061   | 0.535 | 2.2 (0.3, 4.0) p=0.025   | 0.769 |
| <b>Employed vs Retired</b>    | NH White | -5.0 (-6.3, -3.6) p<0.001 | Ref   | 1.1 (-0.6, 2.8) p=0.188   | Ref   | 1.9 (0.4, 3.4) p=0.017   | Ref   |
| <b>Employed vs Student</b>    | Hispanic | 6.6 (1.7, 11.5) p=0.010   | 0.435 | 3.6 (-1.3, 8.5) p=0.148   | 0.641 | 2.2 (-2.7, 7.1) p=0.366  | 0.231 |
| <b>Employed vs Student</b>    | NH Asian | 6.7 (3.5, 9.9) p<0.001    | 0.382 | 3.0 (-0.2, 6.3) p=0.069   | 0.453 | 4.5 (1.4, 7.7) p=0.007   | 0.564 |
| <b>Employed vs Student</b>    | NH Black | 9.6 (5.2, 14.1) p<0.001   | 0.851 | 6.4 (2.6, 10.2) p=0.002   | 0.573 | 8.0 (4.3, 11.7) p<0.001  | 0.463 |
| <b>Employed vs Student</b>    | NH White | 9.1 (4.3, 14.0) p<0.001   | Ref   | 5.1 (0.6, 9.5) p=0.026    | Ref   | 6.1 (1.3, 10.9) p=0.014  | Ref   |
| <b>Employed vs Unemployed</b> | Hispanic | -2.8 (-5.1, -0.5) p=0.020 | 0.639 | -3.0 (-5.2, -0.7) p=0.011 | 0.562 | -1.3 (-3.5, 0.8) p=0.207 | 0.754 |
| <b>Employed vs Unemployed</b> | NH Asian | -0.3 (-4.0, 3.4) p=0.867  | 0.387 | -1.0 (-4.7, 2.7) p=0.591  | 0.595 | -0.1 (-3.5, 3.2) p=0.932 | 0.695 |
| <b>Employed vs Unemployed</b> | NH Black | -0.6 (-2.8, 1.7) p=0.620  | 0.274 | -1.2 (-3.3, 0.9) p=0.247  | 0.505 | 1.9 (-0.1, 3.9) p=0.059  | 0.029 |
| <b>Employed vs Unemployed</b> | NH White | -2.1 (-4.1, -0.1) p=0.040 | Ref   | -2.1 (-4.2, 0.0) p=0.052  | Ref   | -0.9 (-2.8, 1.1) p=0.362 | Ref   |

| Health Insurance              |          | Unadjusted Models           |        | Age-Adjusted Models         |        | Multivariable Models      |       |
|-------------------------------|----------|-----------------------------|--------|-----------------------------|--------|---------------------------|-------|
| Level                         | Group    | Beta (CI) p                 | Int.p  | Beta (CI) p                 | Int.p  | Beta (CI) p               | Int.p |
| <b>Private vs Combination</b> | Hispanic | -9.4 (-11.9, -6.8) p<0.001  | 0.051  | -2.8 (-5.7, 0.0) p=0.052    | 0.075  | 2.0 (-1.0, 4.9) p=0.178   | 0.719 |
| <b>Private vs Combination</b> | NH Asian | -7.0 (-10.5, -3.5) p<0.001  | 0.792  | 0.2 (-3.2, 3.5) p=0.928     | 0.950  | 3.2 (-0.4, 6.8) p=0.076   | 0.696 |
| <b>Private vs Combination</b> | NH Black | -6.8 (-8.5, -5.1) p<0.001   | 0.729  | -1.4 (-3.1, 0.2) p=0.082    | 0.126  | 3.0 (1.3, 4.7) p=0.001    | 0.577 |
| <b>Private vs Combination</b> | NH White | -6.5 (-7.8, -5.2) p<0.001   | Ref    | 0.0 (-1.5, 1.5) p=0.957     | Ref    | 2.5 (1.3, 3.7) p<0.001    | Ref   |
| <b>Private vs Medicaid</b>    | Hispanic | -3.4 (-5.6, -1.2) p=0.003   | <0.001 | -3.6 (-5.7, -1.5) p=0.001   | <0.001 | 0.9 (-1.3, 3.2) p=0.409   | 0.001 |
| <b>Private vs Medicaid</b>    | NH Asian | -4.2 (-8.9, 0.5) p=0.077    | 0.011  | -3.9 (-8.3, 0.5) p=0.081    | 0.001  | 3.4 (-1.1, 8.0) p=0.132   | 0.002 |
| <b>Private vs Medicaid</b>    | NH Black | -3.1 (-5.3, -1.0) p=0.005   | <0.001 | -4.6 (-6.7, -2.6) p<0.001   | <0.001 | 1.5 (-0.6, 3.6) p=0.149   | 0.001 |
| <b>Private vs Medicaid</b>    | NH White | -11.2 (-14.2, -8.2) p<0.001 | Ref    | -12.6 (-15.3, -9.9) p<0.001 | Ref    | -4.6 (-6.9, -2.2) p<0.001 | Ref   |
| <b>Private vs Medicare</b>    | Hispanic | -10.2 (-12.5, -7.9) p<0.001 | 0.360  | -3.4 (-6.0, -0.9) p=0.009   | 0.454  | 2.6 (0.2, 5.0) p=0.037    | 0.478 |
| <b>Private vs Medicare</b>    | NH Asian | -7.2 (-9.9, -4.5) p<0.001   | 0.302  | 0.5 (-2.1, 3.2) p=0.682     | 0.073  | 3.5 (1.1, 5.9) p=0.006    | 0.160 |
| <b>Private vs Medicare</b>    | NH Black | -7.0 (-8.8, -5.2) p<0.001   | 0.109  | -1.1 (-3.0, 0.9) p=0.270    | 0.297  | 4.1 (2.4, 5.8) p<0.001    | 0.012 |
| <b>Private vs Medicare</b>    | NH White | -8.8 (-10.6, -7.1) p<0.001  | Ref    | -2.2 (-4.3, -0.2) p=0.033   | Ref    | 1.5 (-0.4, 3.3) p=0.119   | Ref   |
| <b>Private vs Military</b>    | Hispanic | -9.8 (-16.5, -3.1) p=0.005  | 0.191  | -8.5 (-15.7, -1.3) p=0.023  | 0.267  | -5.8 (-11.9, 0.3) p=0.060 | 0.152 |
| <b>Private vs Military</b>    | NH Asian | 1.5 (-4.2, 7.1) p=0.596     | 0.094  | 3.6 (-0.0, 7.3) p=0.053     | 0.009  | 6.6 (1.2, 12.0) p=0.019   | 0.017 |
| <b>Private vs Military</b>    | NH Black | -6.4 (-11.5, -1.4) p=0.014  | 0.569  | -4.6 (-9.4, 0.3) p=0.063    | 0.843  | -2.3 (-7.0, 2.4) p=0.321  | 0.700 |
| <b>Private vs Military</b>    | NH White | -4.6 (-9.5, 0.3) p=0.067    | Ref    | -3.9 (-8.6, 0.8) p=0.100    | Ref    | -1.2 (-4.5, 2.1) p=0.460  | Ref   |
| <b>Private vs Other</b>       | Hispanic | 0.8 (-1.5, 3.1) p=0.483     | 0.003  | 1.3 (-0.8, 3.4) p=0.210     | <0.001 | 2.6 (0.5, 4.8) p=0.018    | 0.004 |
| <b>Private vs Other</b>       | NH Asian | -3.7 (-7.0, -0.4) p=0.030   | 0.414  | -3.0 (-6.4, 0.5) p=0.090    | 0.180  | 1.0 (-2.2, 4.3) p=0.516   | 0.063 |
| <b>Private vs Other</b>       | NH Black | -0.7 (-2.9, 1.6) p=0.554    | 0.014  | -0.9 (-3.2, 1.3) p=0.393    | 0.009  | 2.7 (0.6, 4.8) p=0.012    | 0.001 |
| <b>Private vs Other</b>       | NH White | -5.4 (-8.3, -2.6) p=0.001   | Ref    | -5.7 (-8.5, -3.0) p<0.001   | Ref    | -2.6 (-4.8, -0.3) p=0.027 | Ref   |

|                             |          |                            |        |                            |        |                           |       |
|-----------------------------|----------|----------------------------|--------|----------------------------|--------|---------------------------|-------|
| <b>Private vs Uninsured</b> | Hispanic | -2.9 (-4.7, -1.0) p=0.003  | 0.001  | -3.6 (-5.4, -1.9) p<0.001  | <0.001 | 0.3 (-1.6, 2.2) p=0.732   | 0.004 |
| <b>Private vs Uninsured</b> | NH Asian | -6.1 (-9.2, -3.0) p<0.001  | 0.294  | -6.4 (-9.4, -3.3) p<0.001  | 0.149  | -1.4 (-4.3, 1.4) p=0.315  | 0.180 |
| <b>Private vs Uninsured</b> | NH Black | -2.7 (-4.4, -1.0) p=0.003  | <0.001 | -4.1 (-5.7, -2.4) p<0.001  | <0.001 | 0.4 (-1.2, 2.1) p=0.601   | 0.003 |
| <b>Private vs Uninsured</b> | NH White | -8.1 (-10.2, -5.9) p<0.001 | Ref    | -9.0 (-10.9, -7.0) p<0.001 | Ref    | -3.5 (-5.2, -1.8) p<0.001 | Ref   |

CI – 95% confidence interval, HS – high school, Int.p – race interaction p-value, NH – non-Hispanic. Multivariable models are adjusted for age, sex, and socioeconomic status variables not included in interaction term. Example Interpretation: there is a significantly greater magnitude of positive association of education level with Life’s Essential 8 among non-Hispanic White Americans than other groups (likelihood ratio test  $p < 0.001$ ). There is a significantly greater magnitude of positive association of income level with Life’s Essential 8 among non-Hispanic White Americans than other groups (likelihood ratio test  $p < 0.001$ ). There is a significantly greater magnitude of negative association of having a disability or health issue that prevents work with Life’s Essential 8 among non-Hispanic White Americans than other groups (likelihood ratio test  $p < 0.001$ ). There is a significantly greater magnitude of negative association of having Medicaid insurance with Life’s Essential 8 among non-Hispanic White Americans than other groups (likelihood ratio test  $p < 0.001$ ).

Table S6. The association of socioeconomic status with Life's Essential 8 score by race and ethnic group, excluding NHANES participants with missing data or history of CVD (final n=12,157).

| Education                  |          | Unadjusted Models         |        | Age-Adjusted Models       |        | Multivariable Models      |        |
|----------------------------|----------|---------------------------|--------|---------------------------|--------|---------------------------|--------|
| Level                      | Group    | Beta (CI) p               | Int.p  | Beta (CI) p               | Int.p  | Beta (CI) p               | Int.p  |
| HS or less vs College+     | Hispanic | 10.1 (7.5, 12.7) p<0.001  | 0.001  | 9.9 (7.5, 12.4) p<0.001   | 0.001  | 7.0 (4.5, 9.5) p<0.001    | <0.001 |
| HS or less vs College+     | NH Asian | 8.5 (5.5, 11.4) p<0.001   | <0.001 | 7.7 (4.9, 10.5) p<0.001   | <0.001 | 5.1 (2.3, 7.9) p=0.001    | <0.001 |
| HS or less vs College+     | NH Black | 9.2 (7.0, 11.4) p<0.001   | <0.001 | 9.4 (7.4, 11.5) p<0.001   | <0.001 | 5.5 (3.5, 7.5) p<0.001    | <0.001 |
| HS or less vs College+     | NH White | 15.5 (13.9, 17.0) p<0.001 | Ref    | 15.3 (13.7, 16.8) p<0.001 | Ref    | 12.7 (11.2, 14.1) p<0.001 | Ref    |
| HS or less vs Some College | Hispanic | 5.0 (3.1, 6.8) p<0.001    | 0.337  | 4.1 (2.4, 5.8) p<0.001    | 0.160  | 2.2 (0.6, 3.8) p=0.009    | 0.045  |
| HS or less vs Some College | NH Asian | 3.2 (-0.2, 6.6) p=0.065   | 0.127  | 2.1 (-1.3, 5.5) p=0.223   | 0.057  | -0.1 (-3.2, 3.0) p=0.947  | 0.012  |
| HS or less vs Some College | NH Black | 4.4 (2.6, 6.2) p<0.001    | 0.100  | 3.7 (2.4, 5.1) p<0.001    | 0.027  | 1.3 (-0.0, 2.7) p=0.053   | 0.001  |
| HS or less vs Some College | NH White | 6.0 (4.6, 7.4) p<0.001    | Ref    | 5.6 (4.3, 6.9) p<0.001    | Ref    | 4.3 (3.1, 5.4) p<0.001    | Ref    |

  

| Income / Poverty Line |          | Unadjusted Models      |       | Age-Adjusted Models    |       | Multivariable Models    |       |
|-----------------------|----------|------------------------|-------|------------------------|-------|-------------------------|-------|
| Continuous            | Group    | Beta (CI) p            | Int.p | Beta (CI) p            | Int.p | Beta (CI) p             | Int.p |
| Income/Poverty Line   | Hispanic | 1.3 (0.8, 1.8) p<0.001 | 0.005 | 1.5 (1.0, 2.1) p<0.001 | 0.001 | 0.2 (-0.3, 0.7) p=0.451 | 0.002 |
| Income/Poverty Line   | NH Asian | 1.5 (0.8, 2.1) p<0.001 | 0.014 | 1.6 (0.9, 2.2) p<0.001 | 0.002 | 0.2 (-0.4, 0.9) p=0.469 | 0.003 |
| Income/Poverty Line   | NH Black | 1.2 (0.8, 1.7) p<0.001 | 0.001 | 1.7 (1.2, 2.1) p<0.001 | 0.001 | 0.3 (-0.2, 0.8) p=0.262 | 0.001 |
| Income/Poverty Line   | NH White | 2.4 (1.9, 2.9) p<0.001 | Ref   | 2.8 (2.3, 3.2) p<0.001 | Ref   | 1.3 (0.9, 1.7) p<0.001  | Ref   |

  

| Employment Status           |          | Unadjusted Models            |       | Age-Adjusted Models          |       | Multivariable Models        |       |
|-----------------------------|----------|------------------------------|-------|------------------------------|-------|-----------------------------|-------|
| Level                       | Group    | Beta (CI) p                  | Int.p | Beta (CI) p                  | Int.p | Beta (CI) p                 | Int.p |
| Employed vs Disabled/Health | Hispanic | -11.6 (-14.9, -8.4) p<0.001  | 0.025 | -9.1 (-12.3, -5.8) p<0.001   | 0.011 | -7.3 (-10.5, -4.1) p<0.001  | 0.184 |
| Employed vs Disabled/Health | NH Asian | -5.2 (-14.6, 4.2) p=0.269    | 0.020 | -3.2 (-12.4, 5.9) p=0.478    | 0.015 | -5.1 (-12.1, 2.0) p=0.152   | 0.182 |
| Employed vs Disabled/Health | NH Black | -9.9 (-12.3, -7.4) p<0.001   | 0.002 | -7.7 (-10.1, -5.4) p<0.001   | 0.001 | -3.7 (-6.2, -1.2) p=0.005   | 0.002 |
| Employed vs Disabled/Health | NH White | -16.5 (-19.2, -13.7) p<0.001 | Ref   | -14.8 (-17.6, -12.0) p<0.001 | Ref   | -10.0 (-12.9, -7.1) p<0.001 | Ref   |
| Employed vs Homemaker       | Hispanic | 0.9 (-1.4, 3.3) p=0.419      | 0.857 | 1.7 (-0.4, 3.8) p=0.116      | 0.685 | 1.7 (-0.6, 3.9) p=0.141     | 0.416 |
| Employed vs Homemaker       | NH Asian | -0.4 (-3.7, 3.0) p=0.830     | 0.432 | 0.3 (-2.6, 3.3) p=0.824      | 0.753 | -1.3 (-4.4, 1.8) p=0.388    | 0.384 |
| Employed vs Homemaker       | NH Black | -2.4 (-6.5, 1.7) p=0.242     | 0.203 | -3.6 (-7.8, 0.5) p=0.080     | 0.110 | -0.3 (-4.0, 3.4) p=0.873    | 0.845 |
| Employed vs Homemaker       | NH White | 1.3 (-1.7, 4.3) p=0.378      | Ref   | 0.9 (-1.9, 3.7) p=0.507      | Ref   | 0.2 (-2.3, 2.6) p=0.880     | Ref   |
| Employed vs Retired         | Hispanic | -5.8 (-8.1, -3.6) p<0.001    | 0.171 | 0.6 (-1.7, 2.9) p=0.590      | 0.290 | -0.1 (-2.5, 2.3) p=0.942    | 0.139 |
| Employed vs Retired         | NH Asian | -4.1 (-7.0, -1.1) p=0.009    | 0.935 | 2.1 (-0.8, 5.0) p=0.146      | 0.866 | 3.2 (-0.1, 6.5) p=0.059     | 0.426 |
| Employed vs Retired         | NH Black | -4.1 (-6.3, -2.0) p<0.001    | 0.960 | 2.3 (-0.1, 4.6) p=0.059      | 0.707 | 2.6 (0.4, 4.9) p=0.021      | 0.483 |

|                               |          |                           |       |                           |       |                          |       |
|-------------------------------|----------|---------------------------|-------|---------------------------|-------|--------------------------|-------|
| <b>Employed vs Retired</b>    | NH White | -4.2 (-5.6, -2.8) p<0.001 | Ref   | 1.8 (-0.0, 3.7) p=0.052   | Ref   | 1.9 (0.3, 3.5) p=0.023   | Ref   |
| <b>Employed vs Student</b>    | Hispanic | 6.6 (1.7, 11.4) p=0.009   | 0.374 | 3.6 (-1.4, 8.5) p=0.151   | 0.511 | 2.0 (-2.9, 6.9) p=0.408  | 0.185 |
| <b>Employed vs Student</b>    | NH Asian | 6.9 (3.0, 10.8) p=0.001   | 0.381 | 3.4 (-0.6, 7.4) p=0.096   | 0.435 | 4.9 (1.1, 8.8) p=0.014   | 0.583 |
| <b>Employed vs Student</b>    | NH Black | 9.4 (4.1, 14.8) p=0.001   | 0.949 | 6.3 (1.7, 11.0) p=0.009   | 0.834 | 7.7 (3.3, 12.2) p=0.001  | 0.689 |
| <b>Employed vs Student</b>    | NH White | 9.6 (4.2, 15.1) p=0.001   | Ref   | 5.7 (0.8, 10.7) p=0.023   | Ref   | 6.6 (1.4, 11.8) p=0.014  | Ref   |
| <b>Employed vs Unemployed</b> | Hispanic | -3.4 (-6.2, -0.6) p=0.020 | 0.110 | -3.5 (-6.1, -0.8) p=0.011 | 0.104 | -1.9 (-4.4, 0.6) p=0.129 | 0.122 |
| <b>Employed vs Unemployed</b> | NH Asian | -1.2 (-6.4, 3.9) p=0.627  | 0.837 | -2.0 (-7.2, 3.1) p=0.434  | 0.646 | -1.8 (-6.4, 2.8) p=0.423 | 0.319 |
| <b>Employed vs Unemployed</b> | NH Black | 0.1 (-2.5, 2.7) p=0.930   | 0.602 | -0.4 (-2.8, 1.9) p=0.705  | 0.824 | 2.7 (0.6, 4.9) p=0.013   | 0.115 |
| <b>Employed vs Unemployed</b> | NH White | -0.7 (-2.9, 1.5) p=0.525  | Ref   | -0.8 (-3.1, 1.6) p=0.510  | Ref   | 0.6 (-1.6, 2.8) p=0.590  | Ref   |

| Health Insurance              |          | Unadjusted Models           |       | Age-Adjusted Models         |       | Multivariable Models       |        |
|-------------------------------|----------|-----------------------------|-------|-----------------------------|-------|----------------------------|--------|
| Level                         | Group    | Beta (CI) p                 | Int.p | Beta (CI) p                 | Int.p | Beta (CI) p                | Int.p  |
| <b>Private vs Combination</b> | Hispanic | -8.8 (-12.0, -5.7) p<0.001  | 0.040 | -1.9 (-5.0, 1.1) p=0.206    | 0.040 | 2.4 (-0.7, 5.5) p=0.125    | 0.433  |
| <b>Private vs Combination</b> | NH Asian | -4.5 (-8.9, -0.0) p=0.048   | 0.731 | 2.7 (-1.6, 7.0) p=0.211     | 0.629 | 5.1 (1.0, 9.3) p=0.017     | 0.497  |
| <b>Private vs Combination</b> | NH Black | -6.7 (-8.6, -4.7) p<0.001   | 0.198 | -0.8 (-2.8, 1.3) p=0.461    | 0.066 | 3.2 (1.1, 5.3) p=0.005     | 0.718  |
| <b>Private vs Combination</b> | NH White | -5.3 (-6.7, -3.8) p<0.001   | Ref   | 1.6 (-0.4, 3.5) p=0.106     | Ref   | 3.6 (2.1, 5.2) p<0.001     | Ref    |
| <b>Private vs Medicaid</b>    | Hispanic | -4.6 (-7.0, -2.2) p<0.001   | 0.010 | -4.9 (-7.1, -2.7) p<0.001   | 0.001 | -0.4 (-3.0, 2.2) p=0.748   | 0.047  |
| <b>Private vs Medicaid</b>    | NH Asian | -4.7 (-10.5, 1.1) p=0.109   | 0.075 | -4.9 (-10.0, 0.3) p=0.064   | 0.013 | 2.3 (-3.8, 8.3) p=0.443    | 0.042  |
| <b>Private vs Medicaid</b>    | NH Black | -3.6 (-6.0, -1.3) p=0.003   | 0.006 | -5.5 (-7.7, -3.2) p<0.001   | 0.004 | 0.4 (-1.7, 2.6) p=0.675    | 0.021  |
| <b>Private vs Medicaid</b>    | NH White | -10.6 (-14.4, -6.9) p<0.001 | Ref   | -12.3 (-15.6, -8.9) p<0.001 | Ref   | -4.2 (-7.2, -1.2) p=0.008  | Ref    |
| <b>Private vs Medicare</b>    | Hispanic | -8.6 (-11.6, -5.6) p<0.001  | 0.854 | -1.6 (-4.5, 1.3) p=0.264    | 0.977 | 4.0 (1.0, 7.1) p=0.012     | 0.209  |
| <b>Private vs Medicare</b>    | NH Asian | -6.9 (-10.0, -3.8) p<0.001  | 0.461 | 0.9 (-2.2, 4.1) p=0.544     | 0.171 | 3.2 (0.5, 6.0) p=0.022     | 0.401  |
| <b>Private vs Medicare</b>    | NH Black | -4.4 (-6.8, -2.0) p=0.001   | 0.010 | 1.8 (-0.5, 4.2) p=0.128     | 0.016 | 6.5 (4.2, 8.7) p<0.001     | <0.001 |
| <b>Private vs Medicare</b>    | NH White | -8.3 (-10.2, -6.4) p<0.001  | Ref   | -1.7 (-4.0, 0.7) p=0.163    | Ref   | 1.7 (-0.4, 3.8) p=0.103    | Ref    |
| <b>Private vs Military</b>    | Hispanic | -12.7 (-19.3, -6.2) p<0.001 | 0.029 | -11.7 (-18.5, -4.9) p=0.001 | 0.043 | -8.2 (-14.2, -2.3) p=0.009 | 0.008  |
| <b>Private vs Military</b>    | NH Asian | 2.3 (-4.2, 8.9) p=0.479     | 0.120 | 3.7 (-0.9, 8.2) p=0.109     | 0.026 | 7.4 (1.0, 13.8) p=0.025    | 0.037  |
| <b>Private vs Military</b>    | NH Black | -5.6 (-12.4, 1.2) p=0.103   | 0.646 | -3.7 (-10.1, 2.7) p=0.246   | 0.949 | -1.3 (-7.1, 4.4) p=0.639   | 0.658  |
| <b>Private vs Military</b>    | NH White | -3.7 (-8.4, 1.0) p=0.115    | Ref   | -3.5 (-8.0, 1.1) p=0.133    | Ref   | 0.2 (-2.9, 3.2) p=0.899    | Ref    |
| <b>Private vs Other</b>       | Hispanic | 1.1 (-1.5, 3.8) p=0.398     | 0.006 | 1.6 (-0.8, 4.0) p=0.190     | 0.001 | 2.5 (-0.2, 5.2) p=0.065    | 0.011  |
| <b>Private vs Other</b>       | NH Asian | -3.7 (-7.3, -0.0) p=0.049   | 0.424 | -2.8 (-6.9, 1.2) p=0.165    | 0.182 | 0.6 (-2.8, 4.1) p=0.718    | 0.083  |
| <b>Private vs Other</b>       | NH Black | -0.2 (-2.4, 2.1) p=0.891    | 0.008 | -0.1 (-2.3, 2.1) p=0.906    | 0.002 | 3.5 (1.1, 5.8) p=0.005     | 0.001  |
| <b>Private vs Other</b>       | NH White | -5.4 (-8.5, -2.4) p=0.001   | Ref   | -6.0 (-8.9, -3.0) p<0.001   | Ref   | -3.0 (-5.6, -0.4) p=0.027  | Ref    |
| <b>Private vs Uninsured</b>   | Hispanic | -4.0 (-6.1, -1.9) p<0.001   | 0.053 | -4.9 (-6.9, -2.8) p<0.001   | 0.035 | -0.6 (-2.8, 1.7) p=0.595   | 0.157  |
| <b>Private vs Uninsured</b>   | NH Asian | -6.2 (-10.0, -2.4) p=0.002  | 0.626 | -6.8 (-10.5, -3.2) p=0.001  | 0.479 | -2.1 (-5.3, 1.1) p=0.185   | 0.736  |
| <b>Private vs Uninsured</b>   | NH Black | -1.6 (-3.8, 0.6) p=0.148    | 0.001 | -3.2 (-5.4, -1.1) p=0.004   | 0.002 | 0.9 (-1.2, 3.0) p=0.399    | 0.024  |
| <b>Private vs Uninsured</b>   | NH White | -7.2 (-9.6, -4.8) p<0.001   | Ref   | -8.2 (-10.5, -6.0) p<0.001  | Ref   | -2.7 (-4.7, -0.7) p=0.010  | Ref    |

CI – 95% confidence interval, HS – high school, Int.p – race interaction p-value, NH – non-Hispanic, NHANES – National Health and Nutrition Examination Survey. Multivariable models are adjusted for age, sex, and socioeconomic status variables not included in interaction term. Example Interpretation: there is a

significantly greater magnitude of positive association of education level with Life's Essential 8 among non-Hispanic White Americans than other groups (likelihood ratio test  $p < 0.001$ ). There is a significantly greater magnitude of positive association of income level with Life's Essential 8 among non-Hispanic White Americans than other groups (likelihood ratio test  $p < 0.001$ ). There is a significantly greater magnitude of negative association of having a disability or health issue that prevents work with Life's Essential 8 among non-Hispanic White Americans than other groups (likelihood ratio test  $p < 0.001$ ). There is a significantly greater magnitude of negative association of having Medicaid insurance with Life's Essential 8 among non-Hispanic White Americans than other groups (likelihood ratio test  $p < 0.001$ ).

**Figure S1. National Health and Nutrition Examination Survey participant flow diagram.**

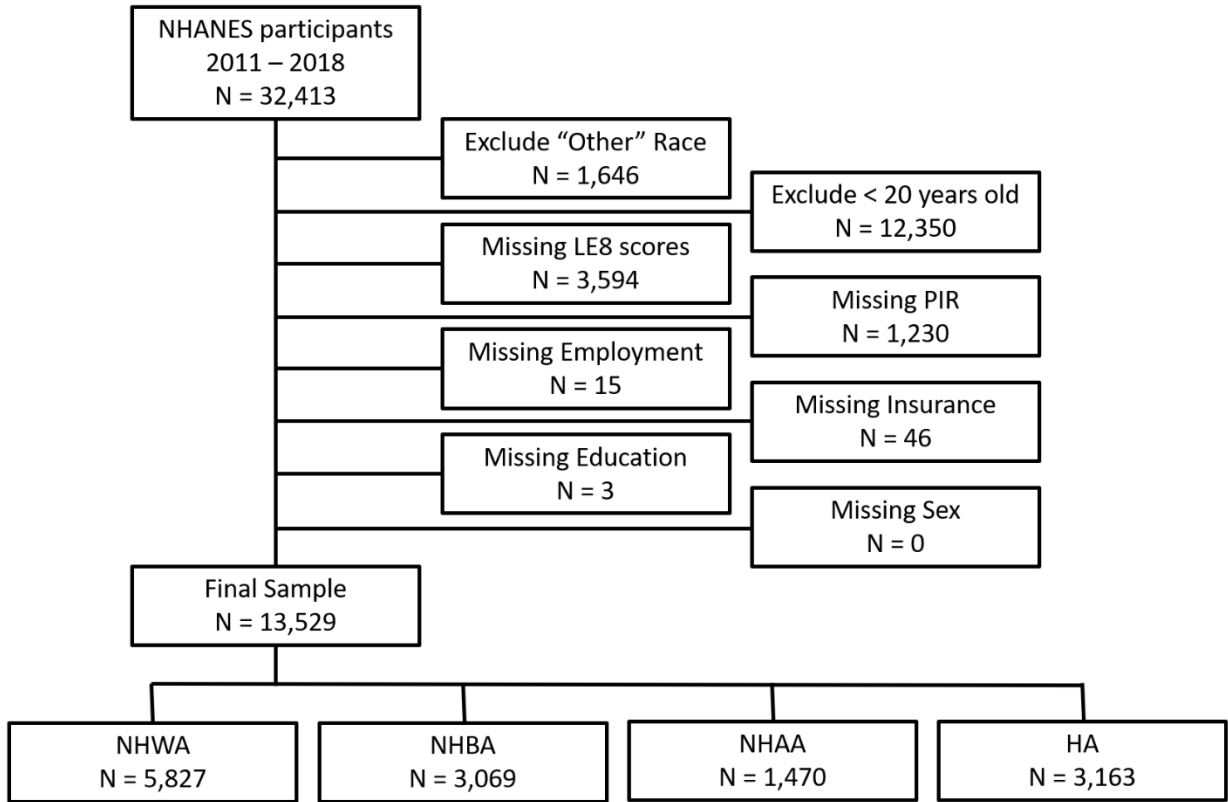

HA – Hispanic Americans, LE8 – Life’s Essential 8, NHAA – non-Hispanic Asian Americans, NHANES - National Health and Nutrition Examination Survey, NHBA – non-Hispanic Black Americans, NHWA – non-Hispanic White Americans, PIR – income to poverty line ratio



**Figure S2. Conceptual Model: Historically marginalized group membership tempers the association of socioeconomic status with Life’s Essential 8.**

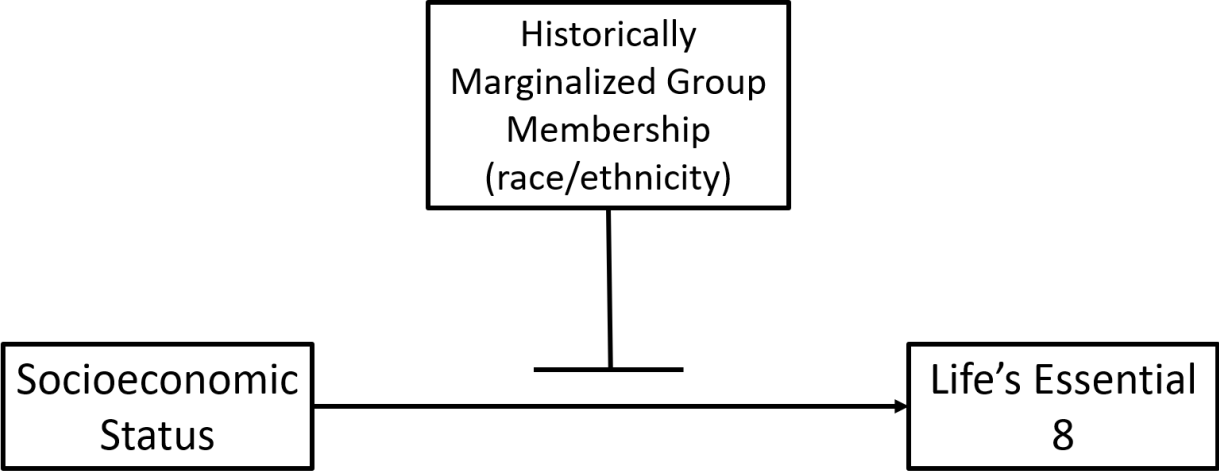

Conceptual Model: Historically marginalized group membership tempers the association of socioeconomic status with Life’s Essential 8. Arrows indicate association. T-shaped connectors indicate inhibition or tempering of an association.
